# Supplementary material for: Clostridium butyricum potentially improves inflammation and immunity through alteration of the microbiota and metabolism of gastric cancer patients after gastrectomy
Source: Front Immunol. 2022 Nov 17;13:1076245. doi: 10.3389/fimmu.2022.1076245 (PMC9714544; doi:10.3389/fimmu.2022.1076245)
Supplement: Supplementary file 1 [file Table_1.xlsx]

## Sheet: Sheet1
Group	Leucocyte (10^9/L)	Neutrophil (%)	IL-1β (pg/mL)	IL-6 (pg/mL)	TNF-α (pg/mL)
AGP1	4.92	71	10.23	21.32	18.52
AGP2	9.27	75.4	12.54	23.22	26.23
AGP3	7.72	63.1	13.64	18.36	15.75
AGP4	7.72	78.8	17.22	28.56	15.32
AGP5	9.66	76.4	19.56	27.27	22.57
AGP6	7.59	60.3	12.33	23.97	17.58
AGP7	7.88	77.3	13.45	19.41	23.78
AGP8	9.17	69.1	16.97	17.56	18.54
AGP9	8.43	77.3	11.69	21.98	16.47
AGP10	6.61	74.7	10.94	29.98	17.31
AGP11	7.01	89.3	11.23	26.45	19.12
AGP12	19.13	94.8	22.15	25.44	20.12
AGP13	8.09	72.3	23.69	22.74	15.33
AGP14	9.41	73.3	18.42	20.94	21.11
AGP15	8.44	65.7	14.36	26.69	23.69
AGP16	9.16	78.4	17.45	29.12	24.41
AGP17	8.06	66.5	19.84	16.14	20.68
AGP18	12.87	77.8	15.46	26.44	19.44
AGP19	10.82	72.3	16.44	27.96	26.47
AGP20	9.36	70.1	14.27	22.45	24.63
AGP21	3.89	38.5	13.87	21.62	22.75
AGP22	10.18	86.3	17.82	18.63	23.54
AGP23	11.05	94.3	11.86	19.98	21.45
AGP24	7.97	82.2	21.56	22.94	19.63
AGP25	10.71	74.3	15.41	15.36	25.51
AGP26	8.17	75.8
AGP27	8.67	75.4
AGP28	7.42	73.3
AGP29	8.29	71.1
AGP30	8.21	64.4
AGP31	10.73	77.8
AGP32	10.82	85.4
AGP33	7.69	58
AGP34	7.41	68.3
AGP35	11.32	82.1
AGP36	16.97	93
AGP37	3.12	46.2
AGP38	5.42	79.8
AGP39	7.65	72.9
AGP40	9.35	77.7
AGP41	7.88	80.1
AGP42	17.7	88.2
AGP43	15.14	77.9
AGP44	8.04	66.9
AGP45	7.48	68
AGA1	5.46	67.6	8.61	21.36	13.78
AGA2	5.02	66.3	9.64	24.51	11.77
AGA3	4.92	71	8.12	19.52	21.45
AGA4	5.05	59.4	10.39	18.44	12.63
AGA5	8.06	64.5	11.64	17.98	10.15
AGA6	7.02	72.1	10.23	22.63	19.63
AGA7	6.36	55.3	12.13	18.26	18.63
AGA8	3.68	71.2	14.87	20.12	19.55
AGA9	3.56	58.9	13.46	24.96	14.36
AGA10	7.92	62.3	19.42	17.42	14.22
AGA11	4.83	68.4	13.69	15.38	16.48
AGA12	3.26	73.8	16.4	21.69	13.89
AGA13	5.58	70.5	16.85	25.87	14.68
AGA14	3.91	76	14.45	22.58	19.44
AGA15	3.16	49.8	16.14	22.36	17.48
AGA16	5.24	73.4	13.11	25.61	17.96
AGA17	6.13	63.7	15.98	23.65	17.02
AGA18	5.46	67.6	15.35	16.23	20.34
AGA19	5.48	61.3	9.46	13.65	15.42
AGA20	3.47	69.2	12.14	24.63	22.12
AGA21	3.31	50.4	11.68	15.41	18.34
AGA22	8.99	70.9	9.77	16.98	15.47
AGA23	7.52	76.7	9.45	16.94	16.96
AGA24	8.4	65.4	11.22	17.85	21.69
AGA25	5.28	77	9.02	20.36	13.21
AGA26	5.83	76.2
AGA27	5.95	69.4
AGA28	6.29	52.8
AGA29	5.96	78.5
AGA30	7.07	77.4
AGA31	6.7	91.9
AGA32	6.83	72.9
AGA33	5.49	65.9
AGA34	6.78	57.6
AGA35	7.07	71.1
AGA36	5.14	71.1
AGA37	7.22	77
AGA38	5.78	72.4
AGA39	5.15	56.5
AGA40	4.38	57.4
AGA41	5.5	52.3
AGA42	7.34	71.3
AGA43	5.47	73.8
AGA44	4.77	68
AGA45	6.61	74.1
AGA46	4.93	60
AGA47	4.07	57.3
