# Supplementary material for: Clostridium butyricum potentially improves inflammation and immunity through alteration of the microbiota and metabolism of gastric cancer patients after gastrectomy
Source: Front Immunol. 2022 Nov 17;13:1076245. doi: 10.3389/fimmu.2022.1076245 (PMC9714544; doi:10.3389/fimmu.2022.1076245)
Supplement: Supplementary file 2 [file Table_2.xlsx]

## Sheet: Sheet1
Group	IgA (g/L)	IgG (g/L)	IgM (g/L)	Percentages of CD3+ cells (%)	Percentages of CD4+ cells (%)	Percentages of CD8+ cells (%)	CD4+/CD8+ ratio	Leukomonocyte (%)	Total protein (g/L)	Albumin (g/L)
AGP1	1.87	9.71	1.59	60.39	35.75	25.73	1.38943	15	54.97	29.88
AGP2	1.12	12.82	0.56	55.62	33.93	24.03	1.41199	11.9	52.84	32.32
AGP3	1.35	6.37	0.35	37.24	18.75	20.36	0.920923	23.7	51.8	25.95
AGP4	2.64	13.24	1.48	45.43	26.13	17.23	1.51654	5.4	46.92	30.69
AGP5	0.98	12.29	0.72	39.46	18.44	23.91	0.771225	12.1	54.55	30.72
AGP6	1.39	11.85	1.24	41.36	19.43	22.06	0.88078	24.5	56.89	29.34
AGP7	1.98	7.29	0.77	51.43	34.46	18.34	1.87895	14.3	56.01	32.18
AGP8	2.32	9.49	0.94	48.36	23.34	26.06	0.895625	14.9	59.53	33.63
AGP9	1.56	11.11	0.46	59.78	26.49	33.74	0.785122	8.7	51.1	30.51
AGP10	1.63	11.24	1.01	48.52	22.46	27.65	0.812297	13.9	66.41	35.69
AGP11	0.92	9.37	1.06	47.25	20.43	28.64	0.713338	6.3	52.79	29.49
AGP12	2.21	10.56	0.85	44.69	18.34	27.61	0.664252	2.9	47.7	30.16
AGP13	2.12	10.05	1.34	35.33	13.46	24.09	0.558738	19.5	58.41	29.91
AGP14	1.47	14.04	0.97	43.85	20.46	24.62	0.831032	14.2	67.6	36.26
AGP15	2.11	14.05	1.23	57.44	27.86	32.06	0.868996	22.3	56.81	32.3
AGP16	2.39	8.29	0.81	52.31	24.09	30.61	0.786998	16.8	62.3	33.3
AGP17	1.69	8.49	1.56	47.62	24.04	24.07	0.998754	22.6	55.92	29.48
AGP18	2.47	9.11	0.54	49.33	22.62	27.49	0.822845	12	56.15	30.92
AGP19	2.36	8.57	1.41	38.55	17.32	23.93	0.723778	14.7	48.63	29.02
AGP20	2.69	8.71	1.13	43.77	23.08	21.64	1.06654	14.1	70.12	35.81
AGP21	3.24	14.57	0.69	53.19	21.99	33.92	0.64829	38.6	49.53	30.53
AGP22	1.48	11.41	0.78	53.69	24.76	30.47	0.812603	6.6	64.07	36.08
AGP23	2.55	10.26	1.45	42.63	22.45	22.34	1.00492	3.5	41.35	23.74
AGP24	1.22	12.81	1.26	58.46	30.69	27.12	1.13164	7.5	60.82	33.61
AGP25	2.74	12.05	0.84	65.39	31.82	30.11	1.05679	13	67.76	37.99
AGP26								15	58.28	32.47
AGP27								12.8	62.5	37.77
AGP28								18.5	74.5	40.05
AGP29								21	70.2	36.3
AGP30								25	55.78	32.42
AGP31								16.6	64.8	35.25
AGP32								8.4	56.39	29.72
AGP33								29.8	57.94	31.18
AGP34								22.3	63.93	34.8
AGP35								7	54	32.35
AGP36								4.2	52.17	29.99
AGP37								28.2	47.86	29.46
AGP38								9.2	62.51	28.22
AGP39								20	63.68	36.59
AGP40								11.7	64.71	39.11
AGP41								9.1	52.92	30.86
AGP42								4.2	55.25	28.57
AGP43								12.8	63.81	34.47
AGP44								24.1	57.78	28.71
AGP45								12.2	54.14	31.47
AGA1	1.46	11.78	1.29	51.46	27.63	16.39	1.68578	23.8	52.02	32.76
AGA2	1.27	10.86	1.64	66.35	31.31	33.43	0.936584	23.9	55.01	29.71
AGA3	2.62	8.79	1.18	49.34	25.06	22.09	1.13445	15	54.97	29.88
AGA4	1.58	8.63	0.64	54.26	29.61	21.19	1.39736	27.3	56.74	31.12
AGA5	3.96	11.89	1.38	61.53	42.63	16.43	2.59464	23.1	60.87	39.76
AGA6	3.54	9.69	0.78	62.33	34.23	26.45	1.29414	19.7	69.38	45.49
AGA7	1.67	9.63	1.51	49.48	22.12	25.06	0.882682	30.8	58.85	33.88
AGA8	2.54	14.56	0.58	65.48	41.06	20.09	2.0438	17.7	62.02	37.42
AGA9	2.85	10.45	1.44	46.92	25.41	19.47	1.30508	9.3	63.44	34.31
AGA10	3.77	14.86	1.04	75.49	35.23	38.36	0.918405	29.5	70.48	39.97
AGA11	2.94	12.36	1.36	52.35	26.32	25.42	1.03541	18.8	58.39	35.83
AGA12	2.07	12.69	0.89	71.29	37.66	32.79	1.14852	20.6	55.35	33.55
AGA13	2.14	9.68	1.99	67.61	35.76	31.08	1.15058	17.7	54.09	32.55
AGA14	3.79	11.56	0.98	47.47	29.12	13.61	2.1396	12.1	58.95	33.76
AGA15	2.27	15.11	1.45	58.42	31.71	24.63	1.28745	35.4	65.7	31.33
AGA16	2.97	13.48	1.46	44.34	26.11	16.42	1.59013	15.6	56.75	31.82
AGA17	3.23	16.32	1.56	56.87	32.14	22.36	1.43739	24.8	79.9	36.35
AGA18	3.36	13.89	1.28	54.96	28.14	23.16	1.21503	23.8	52.02	32.76
AGA19	2.59	12.59	2.07	52.36	29.63	20.64	1.43556	27.2	65.95	37.28
AGA20	2.78	14.78	1.71	45.82	23.36	20.52	1.1384	20.7	60.66	32.55
AGA21	3.55	10.12	1.14	58.95	30.92	26.47	1.16811	39.1	68.01	36.07
AGA22	3.32	15.94	1.73	60.11	37.63	20.09	1.87307	17.1	67.7	35.08
AGA23	2.45	11.25	1.39	48.63	21.07	19.43	1.08441	10.8	62.16	33.47
AGA24	3.41	14.63	1.85	50.79	38.51	19.28	1.99741	19.2	61.66	34.18
AGA25	2.74	13.78	1.65	36.51	17.44	17.98	0.969967	11.6	77.44	39.24
AGA26								15.3	56.61	33.36
AGA27								14.8	52.03	27.91
AGA28								21.8	59.88	31.75
AGA29								10.6	52.99	29.68
AGA30								11	53.43	31.4
AGA31								5.5	59.17	32.99
AGA32								14.6	54.1	32.72
AGA33								25.5	62.94	36.5
AGA34								33.8	58.76	29.75
AGA35								22.5	59.66	33.23
AGA36								17.4	61.64	35.74
AGA37								16.5	68.55	39.51
AGA38								16.4	54.36	30.28
AGA39								30.3	79.9	39.73
AGA40								29.2	60.62	32.52
AGA41								33.3	66.3	33.21
AGA42								13.4	56.51	35.32
AGA43								14.3	66.29	36.5
AGA44								17.4	48.82	28.61
AGA45								18.5	66.43	36.36
AGA46								25.6	68.52	30.98
AGA47								30.7	63.24	31.74
