# Supplementary material for: Clostridium butyricum potentially improves inflammation and immunity through alteration of the microbiota and metabolism of gastric cancer patients after gastrectomy
Source: Front Immunol. 2022 Nov 17;13:1076245. doi: 10.3389/fimmu.2022.1076245 (PMC9714544; doi:10.3389/fimmu.2022.1076245)
Supplement: Supplementary file 3 [file Table_3.xlsx]

## Sheet: Sheet1
Group	Simpson	Shannon	Observed species
BG1	0.953399	5.42917	276.7
BG2	0.95492	5.34038	290.2
BG3	0.771993	3.24529	196.7
BG4	0.915358	4.57623	216.5
BG5	0.912462	4.67679	270.9
BG6	0.91793	4.49964	222.4
BG7	0.937285	5.10107	295.1
BG8	0.95618	5.46789	296.7
BG9	0.951637	5.45191	249.4
BG10	0.895042	4.87012	317.1
BG11	0.932856	4.96902	343
BG12	0.786831	2.91234	120.9
BG13	0.954709	5.47944	316.8
BG14	0.94687	5.09274	259.5
BG15	0.903492	4.62885	253.1
BG16	0.899679	4.64614	228.6
BG17	0.937364	5.18824	267.2
BG18	0.953997	5.58982	305.5
BG19	0.92574	5.24948	368.3
BG20	0.93859	5.05385	331.5
BG21	0.872742	4.15823	184.7
BG22	0.946066	5.34727	317.6
BG23	0.9109	4.13073	141.9
BG24	0.75717	3.51379	272.2
BG25	0.960318	5.82624	334.6
AG1	0.786807	3.69744	192
AG2	0.802966	3.61169	229.2
AG3	0.854162	4.2276	234.8
AG4	0.949394	5.13268	202.1
AG5	0.928487	4.75503	275.2
AG6	0.818452	4.00927	242.7
AG7	0.921517	4.97147	245.2
AG8	0.963388	5.78781	354.1
AG9	0.906914	4.40532	188.7
AG10	0.932555	5.00432	205.2
AG11	0.956606	5.58413	262.8
AG12	0.80649	3.64346	195.6
AG13	0.868992	4.05087	181.8
AG14	0.823958	3.45687	138.2
AG15	0.901098	4.44352	264.9
AG16	0.871085	4.48319	256.8
AG17	0.943156	5.41498	269.1
AG18	0.940207	5.33609	297.4
AG19	0.733266	3.70318	236.1
AG20	0.917889	4.98025	202.8
AG21	0.926208	5.10247	328
AG22	0.817369	4.23652	255
AG23	0.911466	4.91925	280.8
AG24	0.941104	5.10973	220.3
AG25	0.876956	4.57177	309
AGP1	0.904628	4.42785	175.9
AGP2	0.943688	5.21667	234.9
AGP3	0.795912	3.54953	156.6
AGP4	0.927834	5.05596	201.8
AGP5	0.9139	4.51542	249.9
AGP6	0.83203	3.59039	265.1
AGP7	0.823978	3.61647	154.1
AGP8	0.903683	4.96776	312.6
AGP9	0.966975	5.94237	355
AGP10	0.856445	3.8836	191.2
AGP11	0.943569	5.24809	321.2
AGP12	0.951359	5.21417	302.1
AGP13	0.787776	3.76167	217.6
AGP14	0.845537	4.07471	174.6
AGP15	0.95944	5.81251	263.8
AGP16	0.915533	4.49864	141
AGP17	0.85468	4.30609	191.4
AGP18	0.939045	5.00703	252
AGP19	0.951304	5.25139	320.8
AGP20	0.959859	5.21318	176.2
AGP21	0.870201	4.40645	310.7
AGP22	0.930022	5.37003	199.1
AGP23	0.942152	5.07779	247.8
AGP24	0.912416	4.7377	300.7
AGP25	0.876082	4.39902	290.4
AGA1	0.956444	5.38844	241
AGA2	0.944147	5.15413	334.5
AGA3	0.954937	5.28176	216.7
AGA4	0.931562	4.95498	224.6
AGA5	0.835527	4.37842	257
AGA6	0.955766	5.45065	248.7
AGA7	0.948132	5.28601	196.6
AGA8	0.954522	5.30288	187.8
AGA9	0.953562	5.25123	197.2
AGA10	0.957485	5.34686	243.8
AGA11	0.950841	5.09187	208.1
AGA12	0.945879	5.15898	247.3
AGA13	0.951124	5.43602	329.5
AGA14	0.953783	5.23484	251
AGA15	0.924632	4.82325	177.4
AGA16	0.950705	5.37499	274.2
AGA17	0.954398	5.24068	221.8
AGA18	0.930704	4.9103	219.3
AGA19	0.936491	4.9523	237
AGA20	0.815458	3.68375	186.6
AGA21	0.956782	5.37637	224.2
AGA22	0.963178	5.54947	280.2
AGA23	0.96237	5.51856	258.4
AGA24	0.922882	4.4534	149.9
AGA25	0.896592	5.01273	415.1
