# Supplementary material for: Clostridium butyricum potentially improves inflammation and immunity through alteration of the microbiota and metabolism of gastric cancer patients after gastrectomy
Source: Front Immunol. 2022 Nov 17;13:1076245. doi: 10.3389/fimmu.2022.1076245 (PMC9714544; doi:10.3389/fimmu.2022.1076245)
Supplement: Supplementary file 4 [file Table_4.xlsx]

## Sheet: Sheet1
Group	Firmicutes	Proteobacteria	Bacteroidetes	Actinobacteria	Fusobacteria	Verrucomicrobia	Synergistetes	TM7	Lentisphaerae	Euryarchaeota	Others		Group	Bacteroidetes	Firmicutes	Proteobacteria
BG	0.418606	0.208977	0.224421	0.0873946	0.0349357	0.0146457	0.0101556	0.00032223	0.00022381	0.00018219	0.00013667		BG1	0.193823	0.443938	0.226425
AG	0.396707	0.261937	0.153215	0.065558	0.0505303	0.0690993	0.00163292	0.00038981	2.13e-05	0.00060048	0.00030799		BG2	0.311653	0.521325	0.11555
AGP	0.440722	0.224001	0.145552	0.0799186	0.0583732	0.0478631	0.0005355	0.00128328	0.00106843	0.0002388	0.0004447		BG3	0.183634	0.159105	0.412852
AGA	0.538563	0.148157	0.240818	0.0324975	0.0383549	0.00088055	5.46e-05	0.00053211	0	4.4e-05	9.83e-05		BG4	0.246323	0.540104	0.179003
													BG5	0.455059	0.210816	0.160625
													BG6	0.369486	0.407835	0.150824
													BG7	0.40602	0.388038	0.149159
													BG8	0.265118	0.620434	0.04437
													BG9	0.316121	0.528729	0.0684791
													BG10	0.216658	0.214228	0.408142
													BG11	0.248095	0.470052	0.170415
													BG12	0.447371	0.0889253	0.233234
													BG13	0.285939	0.352342	0.330151
													BG14	0.270466	0.515347	0.142246
													BG15	0.163609	0.199618	0.509749
													BG16	0.0476038	0.689359	0.157789
													BG17	0.124516	0.519731	0.265615
													BG18	0.279506	0.573789	0.0535437
													BG19	0.124224	0.605772	0.15831
													BG20	0.110293	0.314648	0.148945
													BG21	0.0627565	0.751588	0.117806
													BG22	0.191695	0.228029	0.281222
													BG23	0.168905	0.461668	0.24174
													BG24	0.02475	0.140076	0.304596
													BG25	0.0968946	0.519653	0.193634
													AG1	0.0934565	0.272318	0.56605
													AG2	0.124238	0.540629	0.312465
													AG3	0.00289491	0.663386	0.177162
													AG4	0.180759	0.560341	0.161146
													AG5	0.246725	0.233114	0.159458
													AG6	0.00115807	0.653463	0.215374
													AG7	0.199288	0.493188	0.25261
													AG8	0.176572	0.549996	0.0699589
													AG9	0.141179	0.260674	0.338812
													AG10	0.0983206	0.366692	0.375141
													AG11	0.209092	0.410851	0.33724
													AG12	0.100224	0.0904897	0.390159
													AG13	0.218495	0.535952	0.13113
													AG14	0.092839	0.343972	0.243866
													AG15	0.164466	0.158548	0.205593
													AG16	0.195014	0.206419	0.57366
													AG17	0.183193	0.488126	0.0749619
													AG18	0.341713	0.503939	0.12606
													AG19	0.0217253	0.271622	0.148824
													AG20	0.313357	0.274168	0.079623
													AG21	0.227666	0.480112	0.232939
													AG22	0.0502	0.332764	0.540927
													AG23	0.0699336	0.219735	0.449573
													AG24	0.124188	0.404503	0.287267
													AG25	0.253684	0.60268	0.098433
													AGP1	0.468808	0.441559	0.0257187
													AGP2	0.272013	0.503139	0.16193
													AGP3	0.0366745	0.320814	0.45454
													AGP4	0.120071	0.538116	0.0924867
													AGP5	0.108412	0.213594	0.454541
													AGP6	0.0829953	0.213686	0.448885
													AGP7	0.157123	0.434975	0.0606982
													AGP8	0.195448	0.302992	0.332211
													AGP9	0.189701	0.624275	0.0968627
													AGP10	0.120596	0.321423	0.235278
													AGP11	0.195061	0.480875	0.151255
													AGP12	0.242882	0.578437	0.105735
													AGP13	0.00202531	0.709626	0.169036
													AGP14	0.108474	0.418159	0.0940073
													AGP15	0.145033	0.603872	0.162105
													AGP16	0.0344898	0.568962	0.217778
													AGP17	0.0200815	0.200446	0.601816
													AGP18	0.201732	0.563641	0.11463
													AGP19	0.219654	0.466147	0.19764
													AGP20	0.223015	0.531297	0.0922021
													AGP21	0.0954346	0.483723	0.324085
													AGP22	0.0355971	0.275313	0.391203
													AGP23	0.215478	0.625868	0.0699336
													AGP24	0.129723	0.320793	0.216802
													AGP25	0.0182748	0.276314	0.328639
													AGA1	0.384307	0.546579	0.0378546
													AGA2	0.275048	0.401596	0.217874
													AGA3	0.218003	0.579444	0.131192
													AGA4	0.294344	0.486876	0.0413245
													AGA5	0.158619	0.257809	0.442719
													AGA6	0.10109	0.721845	0.118372
													AGA7	0.422736	0.450918	0.0747852
													AGA8	0.213166	0.667837	0.0912193
													AGA9	0.253697	0.587404	0.102848
													AGA10	0.26827	0.529177	0.117555
													AGA11	0.265562	0.453525	0.161885
													AGA12	0.141716	0.528922	0.21835
													AGA13	0.395575	0.437989	0.103334
													AGA14	0.292867	0.559566	0.0921335
													AGA15	0.361449	0.561981	0.0457877
													AGA16	0.320254	0.577929	0.0695861
													AGA17	0.206966	0.549545	0.134825
													AGA18	0.147993	0.741142	0.0652612
													AGA19	0.253189	0.477623	0.147977
													AGA20	0.0607156	0.531112	0.321563
													AGA21	0.288524	0.529355	0.141417
													AGA22	0.184366	0.629375	0.099647
													AGA23	0.224136	0.545807	0.143295
													AGA24	0.0602288	0.476139	0.460396
													AGA25	0.227633	0.63457	0.122727
