# Supplementary material for: Clostridium butyricum potentially improves inflammation and immunity through alteration of the microbiota and metabolism of gastric cancer patients after gastrectomy
Source: Front Immunol. 2022 Nov 17;13:1076245. doi: 10.3389/fimmu.2022.1076245 (PMC9714544; doi:10.3389/fimmu.2022.1076245)
Supplement: Supplementary file 5 [file Table_5.xlsx]

## Sheet: Sheet1
Group	Bacteroides	Faecalibacterium	Sutterella	Streptococcus	Bifidobacterium	Akkermansia	Phascolarctobacterium	Fusobacterium	Prevotella	Ruminococcaceae_Ruminococcus	Lactobacillus	Gemmiger	[Ruminococcus]	Collinsella	Parabacteroides	Blautia	Roseburia	Megamonas	Alistipes	Haemophilus	Others		Group	Bacteroides	Faecalibacterium	Gemmiger	Streptococcus	Desulfovibrio	Actinomyces
BG	0.141349	0.0562939	0.0691613	0.0584935	0.0552968	0.0146457	0.0305695	0.0189357	0.0469594	0.0200146	0.0251762	0.00893557	0.0123532	0.0244642	0.0103672	0.0148026	0.0193657	0.0229939	0.0163891	0.0157553	0.317677		BG1	0.177698	0.026462	0.00193267	0.113032	0.00523187	0.00046853
AG	0.0981685	0.0530793	0.0609895	0.0525032	0.0369727	0.0690896	0.0219161	0.0320458	0.0217902	0.00947119	0.0215584	0.0121965	0.00828605	0.00796239	0.0114862	0.0123597	0.00833226	0.0212787	0.00803167	0.0165299	0.415952		BG2	0.265419	0.189876	0.0412899	0.00060285	0	0.00077823
AGP	0.0935374	0.0574778	0.0533009	0.0665443	0.0336069	0.0478547	0.0361952	0.0149063	0.00548521	0.0134537	0.00986472	0.0085167	0.0233554	0.0222763	0.0294748	0.0121154	0.00823131	0.00069073	0.00721255	0.00543433	0.450466		BG3	0.178852	0.0003109	2.14e-05	0.00280881	0	0.00269088
AGA	0.206305	0.132658	0.0831148	0.0300321	0.0225151	0.00088055	0.0383065	0.0221274	0.0114425	0.0397095	0.0246636	0.0499684	0.0250631	0.00735063	0.00663903	0.0153567	0.0178163	6.38e-05	0.0118648	0.00513683	0.248985		BG4	0.00087159	0.00830192	8.72e-05	0.331445	0.00026148	0.00034864
																							BG5	0.140296	0.0578128	0.00627398	0.0123619	0.00803743	0.00023926
																							BG6	0.295086	0.0350979	0	0.23264	0	0.00296657
																							BG7	0.341748	0.133835	0.0401076	0.00083323	7.88e-05	0.00043913
																							BG8	0.207013	0.220305	0.0391074	0.00166415	0	0.00115626
																							BG9	0.296758	0.110627	0	0.065631	6.75e-05	0.00072048
																							BG10	0.180299	0.00111853	0	0.0492393	0	0.011955
																							BG11	0.00729485	0.0574265	0.0278393	0.00323956	0.0122474	0.00052439
																							BG12	0.360294	0.00043742	4.97e-05	0.00015906	0	0.00015906
																							BG13	0.210229	0.0132746	0.0001102	0.0464058	0	0.00250463
																							BG14	0.242248	0.148706	0.0274156	0.00170308	0	0.00069493
																							BG15	0.0803841	0.0313339	0.00022014	0.0355061	0.0627201	0.00394163
																							BG16	0.0135774	0.0205322	0.00086639	0.174963	0.00014242	0.00042726
																							BG17	0.0238765	0.12686	0.00312184	0.0135239	0.0010982	0.00225809
																							BG18	0.00983105	0.0618849	0.00627363	0.173118	0.00452025	0.0007804
																							BG19	0.115505	0.0807475	0.0020883	0.00685481	0	0.00238326
																							BG20	0.0915729	0.00472185	0.00091599	0.00512179	0.0223191	0.00021932
																							BG21	0.0146326	0.00498339	4.89e-05	0.129947	0.00018321	0.0002565
																							BG22	0.0592393	0.0215526	2.42e-05	0.0240725	0.0067709	0.0147414
																							BG23	0.166936	0.0106056	4.56e-05	0.00807959	0.00062922	0.00186943
																							BG24	0.0118251	0.00890002	0.00639441	0.00460307	0.0655314	0.00032879
																							BG25	0.0422488	0.0316348	0.019155	0.0247834	0.0418135	0.00083959
																							AG1	0.0505283	0.00024807	9.02e-05	0.0260929	0.0002819	0.00390154
																							AG2	0.112204	0.0134859	0.0076475	0.0201604	0.0138423	0.0010416
																							AG3	0.00057295	0.00026135	9.05e-05	0.397748	3.02e-05	0.0188672
																							AG4	0.163758	0.240025	0.0423396	0.0020626	0	0.00052503
																							AG5	0.154844	0.00656709	0.00024409	0.139432	0.0700529	0.00026733
																							AG6	0.00037387	0.00408517	0.00051065	0.0864177	0.00019149	0.00267177
																							AG7	0.0289753	0.178533	0.0134981	0.0126394	0	0.00030368
																							AG8	0.143956	0.184802	0.0633482	0.0106602	0.00019701	0.00183872
																							AG9	0.0787851	0.00028397	9.09e-05	0.0200938	0.0938469	0.00154481
																							AG10	0.0626332	8.36e-05	8.36e-05	0.12041	0.0401784	0.00098174
																							AG11	0.14632	0.0307547	0.00989762	0.0886779	0	0.00156278
																							AG12	0.0437758	0.00458997	0.00014159	0.00637168	0.0110679	0.00055457
																							AG13	0.212613	0.00032084	0	0.132877	0	0.0540919
																							AG14	0.0923831	0.113498	0	0.00322002	0	0
																							AG15	0.0393499	0.00316875	0	0.0211434	0.0517047	0.00019874
																							AG16	0.115162	0.00516469	0.00103294	0.00399473	0.0367852	0.00054809
																							AG17	0.169594	0.107133	0.0646115	0.0122771	0.00029124	0.00134421
																							AG18	0.298931	0.131834	0.0600429	0.00058138	0	0.000421
																							AG19	0.0130501	0.00674943	0.00177617	0.0767677	0.00067307	0.00175747
																							AG20	0.190811	0.0110476	0.0228733	0.0537711	0.00040012	0
																							AG21	0.1193	0.110248	0.00385368	0.00761774	0.0065871	0.00110532
																							AG22	0.0432909	0.0419818	0	0.00730909	0.00021818	0.00030909
																							AG23	0.0225112	0.00137672	0	0.0211531	0.006065	0.0008558
																							AG24	0.0970255	0.00238905	0	0.0358788	0	0.00045198
																							AG25	0.053463	0.128349	0.0127394	0.00522315	0.0174742	0.00014863
																							AGP1	0.183415	0.00051496	0.0302504	0.33814	0	0.00333991
																							AGP2	0.241474	0.195073	0.0187482	0.00306272	0	0.00052504
																							AGP3	0.0215605	0	0	0.00446148	0.0100629	0
																							AGP4	0.113703	0.184888	0.00842817	0.00626534	0	0.00012016
																							AGP5	0.0539262	0.00191432	0	0.00310982	0.068469	0.00048425
																							AGP6	0.0159286	0.00344301	0.00012107	0.00093075	0.00784702	0.00012107
																							AGP7	0.0673032	0.0137879	5.25e-05	0.0023868	0	0.00086315
																							AGP8	0.115116	0.00616219	0.008642	0.00899033	0.0234047	0.00109476
																							AGP9	0.0842222	0.0224937	0.0006693	0.291978	0.0264163	0.00389722
																							AGP10	0.111437	0.00024478	0	0.00745385	0.00583516	0.0150103
																							AGP11	0.171907	0.0656825	0.00160137	0.00217892	0.0479537	0.00617797
																							AGP12	0.199739	0.17501	0.0329935	0.00108102	0	0.00082193
																							AGP13	0.00047936	0.00037151	0	0.576267	0.00019175	0.0212598
																							AGP14	0.0734135	0.0195549	0.0137195	0.111902	0	0.00413624
																							AGP15	0.0776153	0.00242956	0.00027237	0.0314209	0.00039222	0.0242412
																							AGP16	0.0255729	0.0585966	0	0.0190836	9.61e-05	0.00032447
																							AGP17	0.00786083	0.00088067	0.00010873	0.0189943	0.0512531	0.00019571
																							AGP18	0.186213	0.179806	0.00999005	0.00206968	0	0.00021209
																							AGP19	0.198823	0.153313	0.038409	0.00110071	9.93e-05	0.00065381
																							AGP20	0.0505986	0.00276409	3.95e-05	0.110098	0	0.00267722
																							AGP21	0.0678315	0.0139322	0.0222646	0.00483153	0.00279595	0.00905318
																							AGP22	0.0269149	0.00322978	5.21e-05	0.0139089	0.00798764	0.00057303
																							AGP23	0.192922	0.239911	0.0147361	0.00088158	0	0.00048639
																							AGP24	0.0377643	0.0469861	6.18e-06	0.0426686	6.18e-05	0.00066091
																							AGP25	0.0126942	0.0459553	0.0118127	0.0603436	0.00807954	0.00208504
																							AGA1	0.331307	0.157229	0.031142	0.00382387	0	0.00036736
																							AGA2	0.259569	0.0625211	0.0767477	0.0107931	8.44e-05	0.00059102
																							AGA3	0.191632	0.178098	0.0471919	0.00350896	0	0.00041177
																							AGA4	0.2406	0.114815	0.154771	0.0403583	0.0001409	0.00042271
																							AGA5	0.101057	0.0181018	0.00070435	0.0239127	0	0.00112696
																							AGA6	0.0920602	0.247475	0.0508599	0.00277189	0	8.4e-05
																							AGA7	0.347662	0.159451	0.0671285	0.00500832	0	0.0003735
																							AGA8	0.201465	0.160803	0.0552735	0.0132664	0	0.0005419
																							AGA9	0.232739	0.156131	0.0540015	0.030022	0	0.00090848
																							AGA10	0.238631	0.116086	0.0679948	0.00433088	0	0.00020713
																							AGA11	0.241271	0.0845095	0.0538069	0.00599955	0	0.00065325
																							AGA12	0.131339	0.110499	0.0791109	0.00429185	0.00025623	0
																							AGA13	0.336546	0.162433	0.0962277	0.00319709	7e-05	0.00014002
																							AGA14	0.268421	0.173573	0.0219144	0.0025722	0.00016203	0.00028355
																							AGA15	0.340515	0.194156	0.0622145	0.00893419	0	0.00014213
																							AGA16	0.284954	0.139345	0.0371076	0.0017576	0.00012377	0.00096544
																							AGA17	0.196229	0.166365	0.0388086	0.00358536	0	0.00141838
																							AGA18	0.142636	0.27763	0.0195096	0.0124822	0	0.000516
																							AGA19	0.239474	0.111931	0.0276343	0.00336	0.00022857	0.0008
																							AGA20	0.0348434	0.010013	0	0.0950701	0.00159442	0.00131806
																							AGA21	0.267342	0.17008	0.0824933	0.0223335	0	0.00053277
																							AGA22	0.169778	0.161443	0.0664739	0.00404032	0	0.00027644
																							AGA23	0.210833	0.157225	0.0575084	0.0107959	0.00025539	0.00048756
																							AGA24	0.0463518	0.00019036	0.00011421	0.0147526	0	0.00034264
																							AGA25	0.0103722	0.0263483	0.00046988	0.419833	0.0365987	0.00516872
