# Supplementary material for: Clostridium butyricum potentially improves inflammation and immunity through alteration of the microbiota and metabolism of gastric cancer patients after gastrectomy
Source: Front Immunol. 2022 Nov 17;13:1076245. doi: 10.3389/fimmu.2022.1076245 (PMC9714544; doi:10.3389/fimmu.2022.1076245)
Supplement: Supplementary file 6 [file Table_6.xlsx]

## Sheet: Sheet1
Group	Acetic acid (mg/g)	Propionic acid (mg/g)	Butyric acid (mg/g)	Isobutyric acid (mg/g)	Valeric acid (mg/g)	Caproic acid (mg/g)
BG1	1.01952	0.399134	0.374144	0.114696	0.132555	0.00933487
BG2	1.25503	0.489825	0.425225	0.13129	0.157065	0.0104295
BG3	1.11595	0.378706	0.357922	0.12338	0.133427	0.00864158
BG4	1.16504	0.341239	0.167147	0.106775	0.0994736	0.00779347
BG5	1.13236	0.351422	0.202984	0.109154	0.10428	0.00780059
BG6	0.291324	1.03425	0.215432	0.0878332	0.121658	0.00130602
BG7	0.282853	1.41602	0.907477	0.12947	0.353348	0.00152202
BG8	0.247988	1.03822	0.0462344	0.0729029	0.0408217	0.00164057
BG9	0.310609	0.95272	0.189018	0.0806621	0.11285	0.00110626
BG10	0.359013	0.651643	0.016741	0.0643031	0.0151033	0.00115122
BG11	3.06486	1.32583	0.528036	0.19096	0.378915	0.0311913
BG12	2.44853	1.29596	0.426964	0.153128	0.277811	0.0660866
BG13	3.15052	1.18661	0.436314	0.155598	0.251205	0.0237442
BG14	2.35616	1.34098	0.284196	0.151366	0.183908	0.0316604
BG15	1.76638	1.15314	0.635577	0.168475	0.321217	0.0181195
BG16	2.26027	0.721475	0.750632	0.169564	0.226181	0.0453747
BG17	2.96638	0.74149	0	0	0	0.0348665
BG18	2.79809	0.843612	0	0	0	0.0321647
BG19	3.15178	0.689247	0	0	0	0.0276035
BG20	2.23925	0.770811	0	0	0	0.0371075
AG1	0.114266	0.0103673	0.00651908	0.00291905	0.0026207	0.00478766
AG2	0.105163	0.00303776	0.00165686	0.0298429	0.0026351	0.00194022
AG3	0.0712248	0.000779333	0.208071	0.0383282	0.00526387	0.00134599
AG4	0.0733868	0.00111558	0.348186	0.0355045	0.00498445	0.00149121
AG5	0.0623891	0.180422	0.211811	0.0497027	0.00923938	0.00155046
AG6	1.3854	0.261155	0.244152	0.0335448	0.0046829	0.00175618
AG7	1.4538	0.205677	0.253402	0.311503	0.477131	0.00187996
AG8	1.34107	0.266628	1.03353	0.304131	0.479946	0.00200502
AG9	1.54767	0.228827	0.89009	0.250851	0.369337	0.00227779
AG10	1.78262	1.84775	0.709919	0.232721	0.341479	0.00236462
AG11	2.78161	2.06391	0.506638	0.272252	0.367694	0.0342043
AG12	3.01851	1.59814	0.515066	0.169564	0.226181	0.0357937
AG13	2.13397	1.52874	0.854273	0.261262	0.254206	0.0185863
AG14	2.75497	1.85764	0.53606	0.21542	0.265579	0.01902
AG15	3.53571	0.843612	0.497473	0.166332	0.232082	0.0186193
AG16	1.57238	0.689247	0.54216	0.185975	0.172795	0.0120515
AG17	1.84139	0.770811	0	0	0	0.016053
AG18	2.37312	0	0	0	0	0.0132548
AG19	1.64948	0	0	0	0	0.0128252
AG20	1.7384	0	0	0	0	0.00992137
AGP1	0.0468551	0.00519158	1.20892	0.0266788	0.00651075	0.00112251
AGP2	0.0561892	0.00171225	0.900119	0.0462073	0.00898524	0.00158214
AGP3	0.0760256	0.0185202	0.735861	0.0356637	0.00873236	0.00294277
AGP4	0.169065	0.000876923	0.0443332	0.0293719	0.011159	0.00210027
AGP5	0.0121993	0.0289775	0.0270772	0.0306972	0.0102846	0.00109468
AGP6	2.08848	0.0643624	0.06092	0.0108145	0.0110338	0.0121499
AGP7	1.53253	0.0227151	0.0413006	0.0161458	0.00910059	0.00457666
AGP8	3.41599	0.01014	0.0463808	0.00376387	0.0125796	0.00265472
AGP9	2.51012	0.0151898	0.279929	0.00268899	0.00601172	0.00372335
AGP10	2.52115	0.198343	0.350032	0.00261292	0.00396542	0.00203322
AGP11	1.69201	0.140817	0.422513	0.078	0.0106236	0.00411872
AGP12	1.49255	0.213699	0.311306	0.066312	0.00896072	0.00259107
AGP13	1.56391	0.193451	0.264465	0.0772317	0.0385248	0.00208168
AGP14	1.77395	0.126362	0.000440975	0.0942629	0.0231827	0.00279791
AGP15	1.20532	0.0988149	0.0877869	0.0553463	0.0163245	0.00198291
AGP16	0.407505	0.0182267	0.0577329	0.0319302	0.0375967	0.00140667
AGP17	0.652569	0.0152325	0.11988	0.00150356	0.0381997	0.00438681
AGP18	0.5408	0.0299257	0.0910108	0.000669495	0	0.00375146
AGP19	0.838236	0.0188335	0.0427639	0.00399233	0	0.00653685
AGP20	0.904717	0.143727	0.019295	0.00483287	0	0.00646008
AGP21	0.346248	0.114305	0.00808887	0.0225307	0	0.00575878
AGP22	0.390343	0.0937125	0.041389	0.0205754	0	0.00239798
AGP23	0.291422	0.151879	0.043535	0.023352	0	0.00291724
AGP24	0.32998	0.15384	0	0.048527	0	0.00231344
AGP25	0.331469	0	0	0.0477386	0	0.00211249
AGA1	3.34195	0.923865	0.00151885	0.15645	0.233095	0.057644
AGA2	0.602232	0.465073	0.00101631	0.109222	0.134935	0.0300153
AGA3	2.14865	0.555639	0.0013501	0.0906078	0.130055	0.0284925
AGA4	4.12961	0.605238	0.900035	0.0881	0.145013	0.0392248
AGA5	2.98127	0.733348	1.09488	0.11497	0.181206	0.0449254
AGA6	2.12838	2.09494	1.12152	0.139364	0.0564671	0.00206041
AGA7	1.91189	1.78722	1.02152	0.116578	0.0522932	0.00159632
AGA8	2.00926	1.96998	1.0967	0.134292	0.057694	0.00177019
AGA9	1.61291	1.62708	0.893233	0.123512	0.0489321	0.00202042
AGA10	2.02699	1.80449	0.929011	0.125395	0.0608343	0.00186805
AGA11	5.3762	3.6035	1.96246	0.110592	0.260953	0.00903132
AGA12	4.2944	2.77346	1.38693	0.0941795	0.161848	0.00303852
AGA13	4.21369	2.94488	1.05721	0.0337812	0.0633445	0.00159935
AGA14	4.43406	2.83135	1.258	0.0512423	0.0954155	0.00170544
AGA15	5.79506	4.15615	1.90816	0.0833413	0.155722	0.00242328
AGA16	2.4184	0.570363	0.876347	0.0265592	0.0438801	0.00160987
AGA17	1.75514	0.736599	0.72322	0.0571478	0.050277	0.0017481
AGA18	1.56024	0.981883	0.532763	0.0711495	0.101871	0.00224931
AGA19	1.26513	0.723895	0.431766	0.0568353	0.048182	0.00202096
AGA20	1.77601	0.815844	0.774264	0.064255	0.0537695	0.00168947
AGA21	1.27614	0.707231	0.431621	0.0578668	0.0493863	0.00225062
AGA22	1.56919	0.841628	0.476249	0.0542147	0.0821482	0.00160062
AGA23	2.36821	0.560296	0.840765	0.0273922	0.0445617	0.00176603
AGA24	2.63241	0.603693	0.962881	0.031138	0.0450744	0.00163795
AGA25	1.66054	0.933197	0.531266	0.0617161	0.0940358	0.00188828
