# Supplementary material for: Clostridium butyricum potentially improves inflammation and immunity through alteration of the microbiota and metabolism of gastric cancer patients after gastrectomy
Source: Front Immunol. 2022 Nov 17;13:1076245. doi: 10.3389/fimmu.2022.1076245 (PMC9714544; doi:10.3389/fimmu.2022.1076245)
Supplement: Supplementary file 7 [file Table_7.xlsx]

## Sheet: Sheet1
Group	Age（years）	Sex	Tumor category	Node category	Metastasis category	TNM stage	Surgical methods
AGP1	73	Female	T3	N3	MO	Ⅲ	Billroth Ⅱ
AGP2	57	Male	T4	N2	MO	Ⅲ	Roux-en-Y
AGP3	83	Male	T2	N1	MO	Ⅱ	Billroth Ⅱ
AGP4	69	Male	T1	N0	MO	Ⅰ	Billroth Ⅱ
AGP5	58	Male	T3	N3	MO	Ⅲ	Billroth Ⅱ
AGP6	76	Male	T1	N0	MO	Ⅰ	Billroth Ⅱ
AGP7	46	Male	T4	N1	MO	Ⅲ	Billroth Ⅱ
AGP8	59	Male	T1	N0	MO	Ⅰ	Billroth Ⅱ
AGP9	56	Male	T2	N2	MO	Ⅱ	Roux-en-Y
AGP10	62	Male	T3	N1	MO	Ⅱ	Billroth Ⅱ
AGP11	68	Female	T4	N3	MO	Ⅲ	Roux-en-Y
AGP12	68	Male	T2	N2	MO	Ⅱ	Roux-en-Y
AGP13	75	Male	T3	N1	MO	Ⅱ	Billroth Ⅱ
AGP14	78	Male	T2	N3	MO	Ⅲ	Roux-en-Y
AGP15	73	Female	T4	N1	MO	Ⅲ	Billroth Ⅱ
AGP16	39	Female	T3	N3	MO	Ⅲ	Roux-en-Y
AGP17	72	Male	T4	N1	MO	Ⅲ	Billroth Ⅱ
AGP18	67	Female	T3	N2	MO	Ⅲ	Billroth Ⅱ
AGP19	37	Female	T2	N2	MO	Ⅱ	Billroth Ⅱ
AGP20	60	Male	T1	N2	MO	Ⅱ	Billroth Ⅱ
AGP21	69	Female	T4	N1	MO	Ⅲ	Billroth Ⅱ
AGP22	57	Male	T2	N2	MO	Ⅱ	Roux-en-Y
AGP23	65	Male	T3	N2	MO	Ⅲ	Billroth Ⅱ
AGP24	63	Male	T3	N2	MO	Ⅲ	Billroth Ⅱ
AGP25	60	Male	T3	N1	MO	Ⅱ	Billroth Ⅱ
AGP26	66	Female	T3	N3	MO	Ⅲ	Billroth Ⅱ
AGP27	62	Male	T2	N3	MO	Ⅲ	Billroth Ⅱ
AGP28	53	Female	T1	N0	MO	Ⅰ	Roux-en-Y
AGP29	66	Male	T3	N0	MO	Ⅱ	Roux-en-Y
AGP30	59	Male	T1	N0	MO	Ⅰ	Roux-en-Y
AGP31	67	Female	T3	N3	MO	Ⅲ	Roux-en-Y
AGP32	75	Male	T4	N3	MO	Ⅲ	Billroth Ⅱ
AGP33	75	Male	T3	N2	MO	Ⅲ	Roux-en-Y
AGP34	71	Female	T1	N0	MO	Ⅰ	Roux-en-Y
AGP35	63	Male	T4	N3	MO	Ⅲ	Roux-en-Y
AGP36	70	Male	T2	N3	MO	Ⅲ	Billroth Ⅱ
AGP37	64	Male	T3	N2	MO	Ⅲ	Roux-en-Y
AGP38	58	Male	T4	N0	MO	Ⅱ	Roux-en-Y
AGP39	52	Male	T3	N2	MO	Ⅲ	Billroth Ⅱ
AGP40	69	Male	T2	N0	MO	Ⅰ	Roux-en-Y
AGP41	68	Male	T2	N1	MO	Ⅱ	Billroth Ⅱ
AGP42	71	Male	T4	N1	MO	Ⅲ	Billroth Ⅱ
AGP43	65	Male	T3	N1	MO	Ⅱ	Roux-en-Y
AGP44	77	Male	T2	N1	MO	Ⅱ	Billroth Ⅱ
AGP45	58	Male	T1	N0	MO	Ⅰ	Billroth Ⅱ
AGA1	74	Male	T4	N3	MO	Ⅲ	Billroth Ⅱ
AGA2	56	Male	T2	N2	MO	Ⅱ	Billroth Ⅱ
AGA3	73	Female	T1	N2	MO	Ⅱ	Billroth Ⅱ
AGA4	64	Male	T4	N3	MO	Ⅲ	Billroth Ⅱ
AGA5	57	Male	T2	N0	MO	Ⅰ	Billroth Ⅱ
AGA6	52	Female	T3	N1	MO	Ⅱ	Billroth Ⅱ
AGA7	74	Female	T1	N2	MO	Ⅱ	Billroth Ⅱ
AGA8	64	Male	T1	N0	MO	Ⅰ	Roux-en-Y
AGA9	64	Female	T4	N2	MO	Ⅲ	Billroth Ⅱ
AGA10	67	Male	T2	N0	MO	Ⅰ	Billroth Ⅱ
AGA11	80	Female	T4	N3	MO	Ⅲ	Billroth Ⅱ
AGA12	78	Male	T2	N0	MO	Ⅰ	Billroth Ⅱ
AGA13	72	Female	T1	N1	MO	Ⅰ	Billroth Ⅱ
AGA14	68	Female	T3	N3	MO	Ⅲ	Roux-en-Y
AGA15	65	Male	T2	N0	MO	Ⅰ	Roux-en-Y
AGA16	63	Female	T3	N3	MO	Ⅲ	Roux-en-Y
AGA17	55	Female	T3	N0	MO	Ⅱ	Billroth Ⅱ
AGA18	74	Male	T3	N2	MO	Ⅲ	Billroth Ⅱ
AGA19	40	Male	T1	N0	MO	Ⅰ	Roux-en-Y
AGA20	67	Male	T3	N2	MO	Ⅲ	Billroth Ⅱ
AGA21	71	Female	T3	N2	MO	Ⅲ	Billroth Ⅱ
AGA22	71	Male	T2	N2	MO	Ⅱ	Billroth Ⅱ
AGA23	72	Male	T2	N1	MO	Ⅱ	Billroth Ⅱ
AGA24	54	Female	T1	N0	MO	Ⅰ	Roux-en-Y
AGA25	51	Male	T3	N1	MO	Ⅱ	Billroth Ⅱ
AGA26	64	Male	T2	N0	MO	Ⅰ	Roux-en-Y
AGA27	76	Male	T2	N3	MO	Ⅲ	Roux-en-Y
AGA28	59	Female	T3	N0	MO	Ⅱ	Billroth Ⅱ
AGA29	80	Male	T3	N3	MO	Ⅲ	Roux-en-Y
AGA30	58	Female	T2	N1	MO	Ⅱ	Roux-en-Y
AGA31	72	Male	T1	N0	MO	Ⅰ	Billroth Ⅱ
AGA32	64	Male	T1	N0	MO	Ⅰ	Billroth Ⅱ
AGA33	67	Female	T1	N1	MO	Ⅰ	Billroth Ⅱ
AGA34	62	Male	T2	N1	MO	Ⅱ	Billroth Ⅱ
AGA35	74	Female	T4	N3	MO	Ⅲ	Billroth Ⅱ
AGA36	68	Male	T3	N1	MO	Ⅱ	Roux-en-Y
AGA37	64	Female	T1	N0	MO	Ⅰ	Roux-en-Y
AGA38	67	Female	T2	N2	MO	Ⅱ	Billroth Ⅱ
AGA39	64	Female	T2	N2	MO	Ⅱ	Billroth Ⅱ
AGA40	74	Female	T2	N0	MO	Ⅰ	Billroth Ⅱ
AGA41	67	Female	T3	N3	MO	Ⅲ	Roux-en-Y
AGA42	74	Female	T2	N1	MO	Ⅱ	Roux-en-Y
AGA43	63	Male	T3	N2	MO	Ⅲ	Billroth Ⅱ
AGA44	47	Female	T3	N1	MO	Ⅱ	Roux-en-Y
AGA45	61	Male	T4	N3	MO	Ⅲ	Billroth Ⅱ
AGA46	81	Female	T3	N0	MO	Ⅱ	Billroth Ⅱ
AGA47	72	Male	T3	N0	MO	Ⅱ	Roux-en-Y
