# Supplementary material for: Clostridium butyricum potentially improves inflammation and immunity through alteration of the microbiota and metabolism of gastric cancer patients after gastrectomy
Source: Front Immunol. 2022 Nov 17;13:1076245. doi: 10.3389/fimmu.2022.1076245 (PMC9714544; doi:10.3389/fimmu.2022.1076245)
Supplement: Supplementary file 8 [file Table_8.xlsx]

## Sheet: Sheet1
Group	Abdominal pain	Bloating	Diarrhea	Constipation	Nausea	Vomiting
AGP	27	23	25	22	2	1
AGA	17	14	12	10	0	1
